# Supplementary material
Source: publisher figshare collection journal article supplement (https://acs.figshare.com/ndownloader/files/4530664)
Supplement: Supplementary file 1 [file 4530664]

## Supporting Information

### Development of Branching in Atom Transfer Radical Copolymerization of Styrene with Triethylene Glycol Dimethacrylate

Hong-Jun Yang, Bi-Biao Jiang\*, Wen-Yan Huang, Dong-Liang Zhang, Li-Zhi Kong,  
Jian-Hai Chen, Chun-Lin Liu, Fang-Hong Gong, Qiang Yu, Yang Yang

School of Materials Science and Engineering, Jiangsu Polytechnic University,  
Changzhou 213164, China

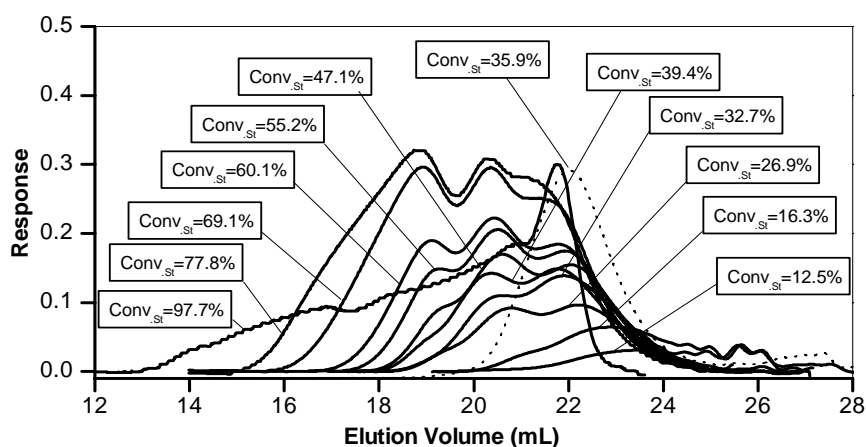

Figure S1. An overlay of SEC chromatograms with conversion for the copolymerization of styrene and triethylene glycol dimethacrylate (*tri*-EGDMA) initiated by *tert*-butyl-2-bromoisobutyrate (*t*-BBiB) and the linear reference without *tri*-EGDMA at 35.9% styrene conversion, polymerization in anisole at 90 °C, *t*-BBiB<sub>1.0</sub>-*tri*-EGDMA<sub>0.9</sub>-Styrene<sub>20</sub>.

---

\*Corresponding Author, Email: jiangbibiao@jpu.edu.cn, Phone: (86)519-8633-0006,

Fax: (86)519-8633-0047

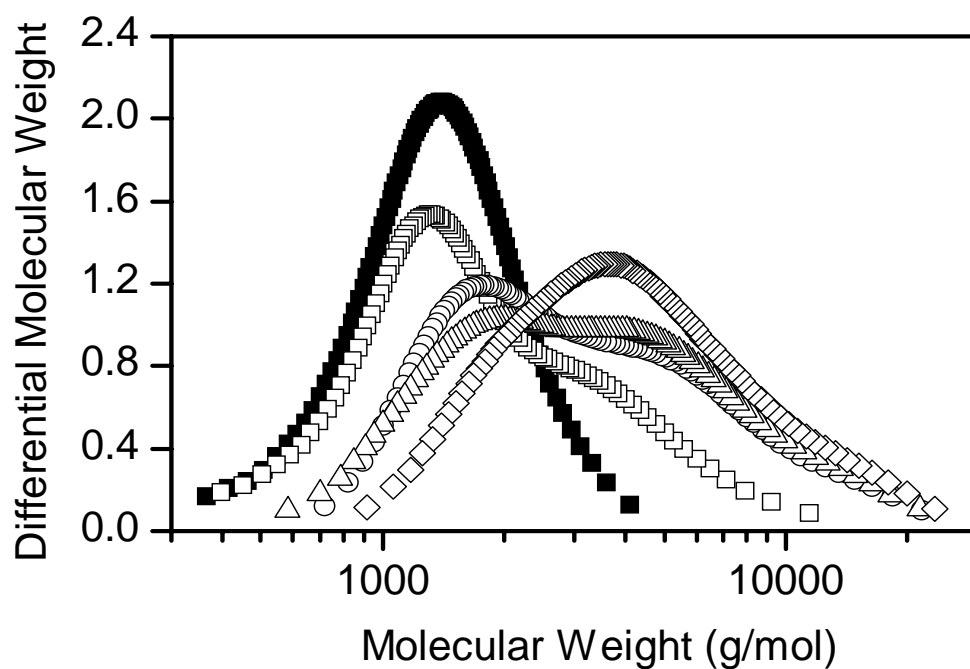

Figure S2. The evolution of the differential molecular weight distribution of the polymers at about 33% styrene conversion for the polymerization of styrene and triethylene glycol dimethacrylate (*tri*-EGDMA) initiated by *tert*-butyl-2-bromoisobutyrate (*t*-BBiB) in anisole at 90 °C. *t*-BBiB<sub>1.0</sub>-*tri*-EGDMA<sub>0.9</sub>-Styrene<sub>x</sub>, where *x* varies from 20 to 50. *x* = 20 (□), 30 (○), 40(△), 50 (◇) and the linear reference from *t*-BBiB<sub>1.0</sub>-Styrene<sub>20</sub> (■).
